# Supplementary material
Source: Springer Nature journal article supplement (https://www.springermedizin.de/resource/supplementary/12955_2009_603_MOESM4_ESM.pdf/9560804)
Supplement: MOESM4 [file 9560804]

Title and abstract screening

n = 574

Excluded

n = 502

Full text assessment

n = **82**

- from database: 72

- from hand search: 10

Excluded: n = **57**

- not measuring self-efficacy or uncertain if scale measures self-efficacy because of limited reporting n = 26
- translation/cultural adaptation n = 14
- background information n = 4
- only validation n = 4
- application of scale n = 2
- no subscale of self-efficacy n = 2
- summary of other article n = 1
- comment on instrument n = 1
- article not found n = 3

Included: n = **25**

|               | Papers | Instruments |
|---------------|--------|-------------|
| Arthritis     | n = 4  | n = 4       |
| Asthma        | n = 5  | n = 5       |
| COPD          | n = 3  | n = 3       |
| Diabetes      | n = 13 | n = 11      |
| Heart failure | n = 0  | n = 0       |
